1     **Treadmilling FtsZ polymers drive the directional movement of sPG-**  
2             **synthesis enzymes *via* a Brownian ratchet mechanism**

3

4     Joshua W. McCausland<sup>1</sup>, Xinxing Yang<sup>1</sup>, Zhixin Lyu<sup>1</sup>, Bill Soederstrom<sup>2</sup>, Jie Xiao<sup>1,\*</sup>,  
5                                     and Jian Liu<sup>3,\*</sup>

6             1. Department of Biophysics and Biophysical Chemistry, Johns Hopkins School of  
7                                     Medicine, USA;

8     2. Structural Cellular Biology Unit, Okinawa Institute of Science and Technology, Japan;  
9     and The ithree institute, University of Technology Sydney, Ultimo, NSW, 2007 Australia;

10            3. Department of Cell Biology, Johns Hopkins School of Medicine, USA.

11            (\*) Corresponding Authors: [xiao@jhmi.edu](mailto:xiao@jhmi.edu) and [jliu187@jhmi.edu](mailto:jliu187@jhmi.edu)

12

13

## 14 **Abstract**

15

16 FtsZ, a highly conserved bacterial tubulin GTPase homolog, is a central component of  
17 the cell division machinery in nearly all walled bacteria. FtsZ polymerizes at the future  
18 division site and recruits > 30 proteins that assemble into a macromolecular complex  
19 termed divisome. Many of these divisome proteins are involved in septal cell wall  
20 peptidoglycan (sPG) synthesis. Recent studies found that FtsZ polymers undergo GTP  
21 hydrolysis-coupled treadmilling dynamics along the septum circumference of dividing  
22 cells, which drives processive movements of sPG synthesis enzymes. The mechanism  
23 of FtsZ treadmilling-driven directional transport of sPG enzymes and its precise role in  
24 bacterial cell division are unknown. Combining theoretical modeling and experimental  
25 testing, we show that FtsZ treadmilling drives the directional movement of sPG-  
26 synthesis enzymes *via* a Brownian ratchet mechanism, where the shrinking end of FtsZ  
27 polymers introduces an asymmetry to rectify diffusions of single enzyme molecules into  
28 persistent end-tracking movement. Furthermore, we show that processivity of this  
29 directional movement hinges on the balance between the enzyme's diffusion and FtsZ's  
30 treadmilling speed, which provides a mechanism to control the level of available  
31 enzymes for active sPG synthesis, explaining the distinct roles of FtsZ treadmilling in  
32 modulating cell wall constriction rate observed in different bacterial species.

33

34

35

36           During cell wall constriction in most gram negative bacteria, new septal  
37 peptidoglycan (sPG) synthesis and old cell wall degradation occur simultaneously<sup>1</sup>. A  
38 large number of cell wall enzymes and their regulators involved in this process has been  
39 identified. However, it remains unclear how these proteins are orchestrated in time and  
40 space to achieve successful cytokinesis and at the same time maintain the structural  
41 integrity of the septal cell wall<sup>2,3</sup>. Perturbations of PG remodeling at septum compromise  
42 cell division and often lead to cell lysis<sup>4</sup>.

43

44           Recent studies have indicated that FtsZ, an essential component of the bacterial  
45 cell division machinery, may play a central part in regulating the spatiotemporal  
46 coordination of sPG synthesis enzymes. FtsZ is a highly conserved bacterial tubulin  
47 homologue and GTPase<sup>5-7</sup>. In *E. coli* during cell division, FtsZ polymerizes at the  
48 cytoplasmic face of the inner membrane to form a ring-like structure (Z-ring) at mid-cell<sup>8-</sup>  
49 <sup>10</sup>. The Z-ring then locally recruits an ensemble of more than 30 proteins, many of which  
50 are sPG-remodeling enzymes<sup>1,11</sup>, to initiate septal cell wall constriction. New studies  
51 employing super-resolution and single-molecule imaging *in vitro* and *in vivo* have  
52 demonstrated that the FtsZ polymers exhibit GTP hydrolysis-driven treadmilling  
53 dynamics, which are the continuous polymerization at one end and depolymerization at  
54 the other end, with individual FtsZ monomers remaining stationary in the middle<sup>12,13</sup>.  
55 Most interestingly, it was found that FtsZ's treadmilling dynamics drives processive  
56 movements of the essential sPG transpeptidase (TPase, FtsI in *E. coli* and PBP2B in *B.*  
57 *subtilis*)<sup>12,13</sup> and glycosyltransferase FtsW<sup>14</sup>. Consequently, it was proposed that the

58 FtsZ's treadmilling dynamics spatially and temporally distribute sPG synthesis enzymes  
59 along the septum plane to ensure smooth septum morphogenesis<sup>13</sup>. However, it is  
60 unknown how FtsZ's treadmilling dynamics with stationary monomers in the cytoplasm  
61 are transduced into the periplasm to drive the persistent and directional movement of  
62 cell wall synthesis enzymes. The role of FtsZ's treadmilling dynamics in modulating sPG  
63 synthesis activity also remains elusive, as it was shown that the cell wall constriction  
64 rate is dependent on FtsZ's treadmilling speed in *B. subtilis*<sup>12</sup> but not in *E. coli*<sup>13</sup>, *S.*  
65 *aureus* or *S. pneumoniae*<sup>15,16</sup>.

66  
67 In this work, we combined agent-based theoretical modeling with single-molecule  
68 imaging-based experimental testing to address the mechanism involved in FtsZ  
69 treadmilling-dependent processive movement of sPG enzymes and the associated role  
70 in bacterial cell division. We found that a Brownian ratchet mechanism underlies the  
71 persistent and directional movement of single sPG synthesis enzyme molecules (using  
72 FtsI as the model) driven by FtsZ's treadmilling dynamics. Most importantly, the  
73 processivity of the Brownian ratchet is modulated by the balance between FtsI's random  
74 diffusion and FtsZ's treadmilling speed. This finding indicates that different bacterial  
75 species could harness the same FtsZ treadmilling machinery – but modulate diffusions  
76 of sPG synthesis enzymes – to achieve distinct processivities of sPG enzymes and  
77 control their availability for sPG synthesis. As such, FtsZ's treadmilling dynamics impact  
78 the rate of cell wall constriction differentially in different species. Given the lack of linear  
79 stepping motors in the prokaryotic world, our work suggests a general framework on  
80 how polymer dynamics coupled with Brownian-ratcheting could underlie directional

81 transport of cargos and be shaped by evolution to meet the needs of different cellular  
82 milieus.

83

## 84 **Results**

### 85 **Model description**

86

87 Our model is based on the concept of a Brownian Ratchet, where FtsZ's treadmilling  
88 events introduce an asymmetry to bias the random diffusion of FtsI molecules in the  
89 periplasm, upon which FtsI persistently follows the shrinking end of a treadmilling FtsZ  
90 filament (Fig. 1). The quantitative details of the model are rooted in the physical and  
91 chemical properties of key components of the system, which can be well characterized  
92 by experiments.

93

94 As shown in Fig. 1, the model describes the movement of a FtsI molecule at the septum  
95 as a quasi-1D problem. The model assumes that FtsI, the essential TPase with a single  
96 transmembrane domain and a cytoplasmic tail, can freely diffuse along the inner  
97 membrane at the septum or interact indirectly with the treadmilling FtsZ filament  
98 underneath the inner membrane (Fig. 1A). The dynamics of a single FtsI molecule at  
99 septum is thus determined by three parameters, the constant of FtsI's free diffusion ( $D$ ),  
100 the treadmilling speed ( $V_Z$ ) of FtsZ filaments, and the attraction force determined by the  
101 binding potential ( $U$ ) between FtsI and FtsZ (Fig. 1B and C). The diffusion constant of  
102 FtsI in *E. coli* and PBP2B in *B. subtilis* were measured to be in the range of  $\sim 10^{-3}$ – $10^{-1}$   
103  $\mu\text{m}^2/\text{s}$  using single-molecule tracking (SMT)<sup>17,18</sup>; the average treadmilling speed of FtsZ

104 was at  $\sim 20 - 40$  nm/s *in vivo* but can be a few-fold faster *in vitro*, therefore we set a  
105 large range of  $10 - 100$  nm/s<sup>19,20</sup>. FtsI interacts with FtsZ at septum indirectly through a  
106 relay of protein-protein interactions that include FtsN, FtsA, and/or FtsEX<sup>1,21</sup>. For  
107 simplicity we omit the details of the protein-protein interaction relay but refer to it as the  
108 interaction between FtsI and FtsZ. The indirect interaction between a FtsZ monomer  
109 and a nearby FtsI molecule constitute an attractive force for each other and can be  
110 described as a short-ranged harmonic binding potential (Fig. 1C). We assumed the  
111 potential range at  $\pm 2.5$  nm, commensurate with the size of a FtsZ monomer ( $\sim 5$  nm)<sup>22-</sup>  
112 <sup>25</sup>, and the potential's magnitude at  $\sim 10 k_B T$ , corresponding to a  $K_d$  in the  $\mu M$  range,  
113 which is typical for protein-protein interactions in the bacterial divisome system<sup>26-30</sup>.

114

115 To numerically compute the model, we describe the dynamics of FtsI by a Langevin-  
116 type equation (equation (1)) where the viscous drag force on the molecule is in balance  
117 with a driving force  $f$  and a force from thermal noise  $\xi$ .

118 
$$\lambda \frac{dx(t)}{dt} = f(x(t)) + \xi(t) \quad \text{Equation (1)}$$

119

120 Here,  $x(t)$  represents the location of a FtsI molecule at time  $t$  along the 1D septum.  $\lambda$  is  
121 the effective viscous drag coefficient for FtsI's movement with  $\lambda = k_B T/D$ , where  $D$  is the  
122 diffusion constant of the free FtsI on the inner membrane when it is not interacting with  
123 FtsZ.  $f(x(t))$  is the attractive force exerted upon the FtsI molecule by the FtsZ binding  
124 potential,  $U(x, t)$  (Fig. 1C). Specifically,  $f(x(t)) = -\partial U(x, t)/\partial x$  at time  $t$ . The last term  $\xi(t)$

125 reflects the random diffusive motion of the FtsI on the inner membrane with  $\langle \xi(t) \cdot \xi(t') \rangle =$   
126  $2D \cdot \Delta t \delta(t-t')$ , where  $\Delta t$  is the unitary time step in simulation.

127

128 Next, we simulate the shrinking of a FtsZ filament according to equation (2), which  
129 describes how the position of the shrinking end of a treadmilling FtsZ filament at time  $t$ ,  
130  $x_Z(t)$ , is related to the shrinking rate,  $V_Z$ ,

131 
$$\frac{dx_Z(t)}{dt} = V_Z \quad \text{Equation (2)}$$

132 Each time when a FtsZ subunit falls off from the shrinking end of the filament, the  
133 associated binding potential vanishes with it.

134

135 To discern principal interactions, the model only considers one FtsI molecule and one  
136 FtsZ filament in a self-contained septal section. Hereby, we do not consider complicated  
137 cases, in which the movement of one FtsI molecule may be interfered by different FtsZ  
138 filaments undergoing treadmilling in the same or opposite directions. Further, we do not  
139 consider FtsI molecules that are bound to the middle of FtsZ filaments, as these FtsI  
140 molecules will either diffuse away, or eventually start end-tracking FtsZ filaments when  
141 the shrinking end of the treadmilling FtsZ filament approaches. These complicated  
142 scenarios can be decomposed into the elementary process elucidated by the model.

143

144 Assuming that the FtsZ filament treadmills from left to right with a steady-state length of  
145  $\sim 200$  nm, the model implements a hard-wall boundary condition on the FtsI molecule at  
146 the left edge of the system, while keeping the right edge as an open boundary so that  
147 the right-ward FtsZ treadmilling is not limited. We also note that the model results

148 presented below reflect the nominal case, whose essence remains robust against the  
149 variations of the model parameters within the physical range constrained by existing  
150 experimental data.

151

## 152 **A Brownian-ratchet mechanism can couple FtsI's directional movement to FtsZ's** 153 **treadmilling dynamics**

154

155 As we described above, Brownian-ratcheting hinges on the diffusion of FtsI, its  
156 interaction with FtsZ, and FtsZ's treadmilling speed. To examine how the movement of  
157 FtsI depends on FtsI's diffusion and the binding potential between FtsI and FtsZ, we  
158 kept FtsZ's treadmilling speed constant at an experimentally measured 25 nm/s and  
159 carried out a phase diagram study using stochastic simulations. We chose a parameter  
160 range of 0.0001 to 0.1  $\mu\text{m}^2/\text{s}$  for FtsI's diffusion based on commonly measured diffusion  
161 constants for bacterial inner membrane proteins<sup>17,18</sup>. The upper limit of the binding  
162 potential was set  $\sim 20 k_{\text{B}}T$ , which corresponded to a dissociation constant  $K_{\text{d}}$  in the nM-  
163 range.

164

165 We considered an initial condition in which both the shrinking end of a FtsZ filament and  
166 a FtsI molecule were at the left boundary of the septal section. To be commensurate  
167 with our experimental analysis, we counted a FtsI trajectory as being moving  
168 directionally if it tracked the shrinking end of a treadmilling FtsZ filament persistently and  
169 unidirectionally for  $\geq 4$  seconds. Because of the stochastic nature of Brownian  
170 ratcheting, if 50% or more of simulated FtsI trajectories displayed such a persistent



171 directional movement, we characterized the state of FtsI under this parameter set  
172 condition as persistent end-tracking in the phase diagram.

173

174 As shown in the phase diagram in Fig. 2A, the model showed that when the binding  
175 potential between FtsZ and FtsI was weak ( $< 5 k_B T$ ,  $\sim$  mM Kd), FtsI largely displayed  
176 random diffusion without directional movements along the septum. When the attraction  
177 potential was sufficiently strong ( $> 5 k_B T$ ), strong binding quenched free diffusions and  
178 confined FtsI to the end of a FtsZ filament. As the FtsZ subunit at the shrinking end of  
179 the filament fell off, the next one in the row attracted and coupled FtsI, which pulled FtsI  
180 to the right by  $\sim 5$  nm. With the subsequent FtsZ subunits falling off one after the other  
181 from the shrinking end, the FtsI molecule ratcheted forward and stably tracked the end  
182 of the treadmilling FtsZ filament. These consecutive movements resulted in a persistent  
183 and directional trajectory of FtsI with 5-nm sub-steps (Fig. 2B). Consequently, the speed  
184 of FtsI directional movement was tightly coupled to FtsZ's treadmilling speed (Fig. 2C),  
185 recapitulating the experimentally measured nearly linear correlation between FtsI's  
186 directional moving speed with FtsZ's treadmilling speeds in both wildtype and FtsZ  
187 GTPase mutants<sup>13</sup>.

188

189 The phase diagram also showed that at a constant binding potential between FtsZ and  
190 FtsI, persistent end-tracking of FtsI required an appropriate range of diffusion constant  
191 (Fig. 2A). If FtsI diffused too rapidly, it could not be confined by the binding potential of  
192 the shrinking end of the FtsZ filament. Conversely, when FtsI diffused too slowly, it  
193 would not be able to keep up with the speed of departing FtsZ subunits at the shrinking

194 end. Once falling behind, the FtsI molecule would lose the contact with the left most  
195 FtsZ subunits permanently.

196

197 Taken together, the phase diagram analysis showed that the Brownian-ratchet  
198 mechanism was able to couple FtsI's directional movement to FtsZ's treadmilling within  
199 the parameter range that is well consistent with experimentally measured data, *i.e.*,  
200 0.001 to 0.1  $\mu\text{m}^2/\text{s}$  for FtsI's diffusion coefficient,  $> 5 k_{\text{B}}T$  for the binding potential  
201 between FtsI and FtsZ, and at the *in vivo* FtsZ treadmilling speed of  $\sim 25$  nm/s. Further,  
202 the same model could explain the nondirectional movement of the other divisome  
203 protein FtsN in a recent *in vitro* study<sup>19</sup>. In that study, the cytoplasmic tail of FtsN was  
204 reported to follow the tracks of treadmilling FtsZ filaments on a supported lipid bilayer at  
205 the ensemble level. At the single molecule level, however, the FtsN tail only binds and  
206 unbinds FtsZ filaments transiently but does not exhibit directional movement<sup>26</sup>. Such a  
207 scenario could be explained by to our Brownian ratchet model in that the diffusion of  
208 free FtsN cytoplasmic tail anchored on the membrane was too large (0.3 – 0.6  $\mu\text{m}^2/\text{s}$ )<sup>19</sup>  
209 to be confined by the binding potential of FtsZ.

210

### 211 **FtsZ's treadmilling speed modulates processivity of FtsI's end-tracking**

212

213 Next, we investigated how FtsZ's treadmilling speed impacts the processivity of FtsI's  
214 directional movement. Addressing this question will help us understand the role of  
215 FtsZ's treadmilling dynamics in the spatial organization and/or regulation of sPG  
216 synthesis activity. We focused on three features that collectively defined the processivity

217 of FtsI's end-tracking: (1) the propensity, (2) the run distance, and (3) the duration of  
218 persistent end-tracking trajectories.

219

220 We first examined how the propensity of FtsI's persistent end-tracking was modulated  
221 by FtsZ treadmilling speed. Here we define the propensity as the percentage of FtsZ  
222 trajectories that showed > 4s directional movement in all simulated trajectories under  
223 each parameter set. Keeping the diffusion constant of FtsI at  $0.01 \mu\text{m}^2/\text{s}$  and the binding  
224 potential at  $10 k_B T$ , stochastic simulations of the Brownian ratchet model predicted that  
225 when the FtsZ treadmilling speed was < 50 nm/s, nearly all simulated FtsI trajectories  
226 displayed persistent end-tracking (Fig. 3A). However, as the FtsZ treadmilling speed  
227 increased beyond 50 nm/s, the percentage of persistent end-tracking trajectories of FtsI  
228 dropped off sharply to 60% at 75 nm/s, and further to 20% at 100 nm/s (Fig. 3A). That is,  
229 when the FtsZ treadmilling was too fast, FtsI could not couple FtsZ shrinking end in  
230 most cases and became largely diffusive.

231

232 To further this point, we calculated the phase diagram of FtsI's persistent end-tracking  
233 propensity as a function of both FtsI's diffusion constant and FtsZ treadmilling speed  
234 (Fig. 3B), while keeping the binding potential fixed at  $10 k_B T$ . Again, we used a 50% FtsI  
235 persistent end-tracking trajectories as the criterium for the phase boundary. As shown in  
236 Fig. 3B, for a fixed diffusion constant of FtsI, there was an upper limit of FtsZ's  
237 treadmilling speed that FtsI could persistently couple. Conversely, for a fixed FtsZ  
238 treadmilling speed, persistent end-tracking of FtsI required an appropriate range of  
239 diffusion constants. Importantly, a very large diffusion constant of FtsI ( $> 0.1 \mu\text{m}^2/\text{s}$ ) did

240 not support persistent end-tracking irrespective of FtsZ's treadmilling speed. These  
241 results were consistent with the phase diagram in Fig. 2A and the recent *in vitro* study of  
242 FtsN's cytoplasmic tail<sup>26</sup>.

243

244 Next, we investigated how FtsZ's treadmilling speed modulates the run distance and  
245 duration of FtsI's persistent end-tracking. The Brownian ratchet model predicted that  
246 both the run length and duration of FtsI's persistent end-tracking should display broad  
247 distributions due to the stochastic nature of FtsI's diffusion and the interaction between  
248 FtsI and FtsZ. Moreover, the model predicts that when FtsZ's treadmilling speed  
249 increase, the duration of FtsI's persistent end-tracking will decrease (Fig. 3C), whereas  
250 the run distance will display a biphasic dependence that peaks around an intermediate  
251 FtsZ treadmilling speed (~ 50 nm/s at the current parameter setting, Fig. 3D).  
252 Importantly, such distinctive dependences of duration and run distance on FtsZ  
253 treadmilling speed is a natural consequence of the Brownian ratchet mechanism  
254 (Supplementary Info). Qualitatively speaking, when a FtsZ subunit falls off from the  
255 shrinking end of the FtsZ filament, the associated FtsI molecule will either diffuse away  
256 or catch up with the next FtsZ subunit in the row to continue end-tracking, the latter  
257 depending on how fast FtsZ treadmills. When FtsZ treadmills too fast (for example > 50  
258 nm/s), it will be difficult for FtsI to catch up (Fig. 3A), resulting in early termination of  
259 end-tracking, and hence both the persistence run distance and duration will be short.  
260 When FtsZ treadmills relatively slowly (< 50 nm/s), the probability of FtsI catching up  
261 with the shrinking end of the FtsZ filament is high (Fig. 3A). Therefore, the persistence  
262 run distance will be proportional to the FtsZ treadmilling speed as predicted in Fig. 3D.

263 Within the same time window, however, when FtsZ treadmills slowly, an end-tracking  
264 FtsI molecule would face fewer number of dissociation events, and hence there is a  
265 lower chance for FtsI to diffuse away to terminate the trajectory, leading to a longer  
266 duration of persistence run compared to the regime when FtsZ treadmills relatively fast  
267 (but still  $< 50$  nm/s). One can imagine in the extreme case where FtsZ does not  
268 treadmill at all ( $V_z = 0$ ), the duration of persistence runs would then be mainly dictated  
269 by the intrinsic dissociation rate of FtsI from FtsZ, and the persistence run distance  
270 would be the shortest (i.e., the size of a single FtsZ subunit). An analytical proof of  
271 these relationships was provided in Supplementary Information and Extended Data Fig.  
272 1.

273

#### 274 **Single-molecule tracking of FtsI confirms model predictions**

275 To experimentally examine the model's predictions as described above, we performed  
276 single-molecule tracking (SMT) of a functional sandwich fusion protein FtsI-Halo<sup>SW</sup>  
277 labeled with JF646 in live *E. coli* cells<sup>31,32</sup>. To avoid disrupting the cytoplasmic  
278 interactions of FtsI's N-terminal tail with other divisome proteins, we inserted the Halo  
279 tag between the last residue (18) of the N-terminal cytoplasmic tail and the first residue  
280 of the inner membrane helix (19) of FtsI (Fig. 4Ai). We integrated the *ftsI-halo*<sup>SW</sup> fusion  
281 gene into the chromosome replacing the endogenous *ftsI* gene and showed that it was  
282 expressed as a full-length fusion protein and supported normal cell division  
283 indistinguishable from wild-type (WT) cells (Extended Data Fig. 2).

284

285 To obtain precise measurements of the persistence run distance and duration of single  
286 FtsI-Halo<sup>SW</sup> molecules, we trapped individual *E. coli* cells vertically in agarose  
287 microholes made using cell-shaped nanopillar molds as previously described<sup>33,34</sup> so that  
288 the entire circumference of the septum could be visualized at the same focal plane (Fig.  
289 4Aii). To determine whether a FtsI-Halo<sup>SW</sup> molecule was at a septum, we labeled the  
290 FtsZ-ring using an ectopically expressed GFP-ZapA fusion protein, which we and others  
291 have previously shown as a faithful marker of the Z-ring localization and dynamics<sup>35</sup>.  
292 The GFP-ZapA image also allowed us to unwrap the circular trajectories of FtsI-Halo  
293 molecules along the septum to linear displacements along the circumference of the  
294 septum, from which we could measure the persistent run speed, distance, and duration  
295 (Fig. 4Aiii-v).

296  
297 As shown in Fig. 4B, the directional moving speed of FtsI-Halo exhibited a wide  
298 distribution as we previously showed for FtsZ's treadmilling. Consistent with our  
299 prediction (Fig. 3A), the occurrence of FtsI's directional movement decreases  
300 significantly as the speed is > 40 nm/s. Most excitingly, the persistence run distance and  
301 duration exhibited precisely the same trends as what was predicted by the model: while  
302 the run duration decreased monotonically (Fig. 4C), the persistence run length  
303 increased and then decreased when FtsI's speed increased (Fig. 4D). Note here that  
304 we inferred FtsZ's treadmilling speed from FtsI's directional moving speed due to the  
305 difficulty in the two-color co-tracking experiment, although we have demonstrated  
306 previously that these two were linearly coupled<sup>13</sup>. Also note that one potential caveat in  
307 these experiments was that a very fast FtsZ treadmilling speed (*i.e.*, > 80 nm/s) is rare

308 in wildtype *E. coli* cells as we showed previously and here by the FtsI speed distribution.  
309 Therefore, given the relatively small dataset for high speed FtsZ treadmilling, our data  
310 may not be definitive to distinguish whether the FtsI couldn't effectively end-track fast  
311 FtsZ treadmilling or there were simply not many fast FtsZ treadmilling events in the first  
312 place. Nevertheless, the agreement of our experimental measurements with theoretical  
313 predictions supported the validity of the Brownian ratchet model.

314

315 **Brownian ratchet mechanism explains the differential dependence of sPG**  
316 **synthesis activity on FtsZ treadmilling speed in different bacterial species**

317

318 In *E. coli*, the total amount of septal PG synthesis and the septum constriction rate are  
319 insensitive to perturbations in FtsZ's treadmilling speed from ~ 8 nm/s to ~ 30 nm/s in a  
320 series of FtsZ GTPase mutants<sup>13</sup>. This insensitivity suggests that end-tracking,  
321 directional moving FtsI molecules were unlikely active in sPG synthesis. Thus, the  
322 functional role of FtsZ's treadmilling in *E. coli* is proposed to spatially control the location  
323 of sPG synthesis by acting as a shuttle to transport sPG synthase molecules along the  
324 septum without affecting their enzymatic activity<sup>13</sup>. In *B. subtilis*, however, it was shown  
325 that the constriction time positively correlated with FtsZ's treadmilling speed, suggesting  
326 that the faster FtsZ treadmills, the more sPG synthesis activity there is<sup>12</sup>. Many factors  
327 have been proposed to explain why there is such a difference, such as cell wall  
328 synthesis precursor levels, species-specific protein-protein interactions, septal cell wall  
329 compositions or cell wall constriction stages, but none has been confirmed. As we show  
330 below, the interplay between the diffusion of synthase molecules and FtsZ's treadmilling

331 speed in the Brownian ratchet model determines the fraction of active sPG synthases,  
332 which naturally gives rise to the differential dependence of sPG synthesis activity on  
333 FtsZ's treadmilling speed.

334  
335 To illustrate the interplay between the diffusion of synthase molecules and FtsZ's  
336 treadmilling, we first determined the fraction of time a FtsI molecule spent in persistent  
337 end-tracking (termed "fraction of end-tracking") at different FtsZ treadmilling speeds.  
338 The fraction of end-tracking is defined as the time a FtsI molecule continuously end-  
339 tracks the shrinking end of a FtsZ filaments divided by the total time simulated, which is  
340 typically 60 s. As shown in Fig. 5A, when FtsI diffused relatively fast ( $\sim 0.05 \mu\text{m}^2/\text{s}$ ,  
341 dashed line with triangle), the fraction of time FtsI molecules spent in end-tracking was  
342 largely insensitive to FtsZ's treadmilling speed so that it only decreased from 99% to 91%  
343 when the corresponding FtsZ treadmilling speed increased 3-fold from  $\sim 8 \text{ nm/s}$  to 25  
344  $\text{nm/s}$ . In contrast, when FtsI diffused relatively slowly, the fraction of time FtsI  
345 molecules spent in end-tracking not only reduced significantly as compared to that of  
346 faster diffusion but was critically dependent by FtsZ treadmilling speed. For example, at  
347 a diffusion constant of  $0.003 \mu\text{m}^2/\text{s}$ , the fraction of end-tracking FtsI molecules  
348 decreased from 73% to 24% when FtsZ treadmilling speed increased from  $\sim 8 \text{ nm/s}$  to  
349  $25 \text{ nm/s}$  (continuous line with circle). The physical reason behind this drastic difference  
350 between fast and slow FtsI diffusion lies at the core of Brownian ratchet mechanism. A  
351 fast diffusion will allow FtsI to catch up with the shrinking end of a FtsZ filament in very  
352 short time (Fig. 5B). When FtsI's diffusion becomes slower and slower, it eventually  
353 becomes the rate-limiting factor in the Brownian ratchet—more than often the slow FtsI



354 molecules falls behinds the FtsZ shrinking end and takes a long time to catch up with  
355 the shrinking end of a departing FtsZ filament, or simply just diffuses away and become  
356 lost (Fig. 5C). As such, further increasing the FtsZ treadmilling speed in the latter case  
357 will significantly reduce the chance of FtsI keeping up with the FtsZ shrinking end and,  
358 hence the percentage of end-tracking.

359

360 Exploiting the above results could allow us to explain the differences between *E. coli*  
361 and *B. subtilis*. Consider that the fraction of time a FtsI molecule end-tracks reflects the  
362 overall fraction of all FtsI molecules that are associated with treadmilling FtsZ filaments  
363 at the septum. As we previously showed in *E. coli* that the FtsZ treadmilling-driven  
364 population of FtsI are not active in sPG synthesis, it follows that the active FtsI  
365 population would be proportional to the fraction released from treadmilling FtsZ  
366 filaments. Therefore, FtsZ's treadmilling speed could modulate the amount of sPG  
367 synthases that would be available for synthesis in different bacterial species depending  
368 on the diffusion of sPG synthase molecules.

369

370 In *E. coli*, we observed that the sPG synthesis activity was insensitive to FtsZ's  
371 treadmilling speed from 8 nm/s to ~ 30 nm/s in a series of FtsZ GTPase mutants<sup>13</sup>. This  
372 insensitivity could be explained by the Brownian ratchet model if the diffusion of FtsI in *E.*  
373 *coli* is fast enough so that there is negligible change in the fraction of end-tracking FtsI  
374 molecules when FtsZ's treadmilling speed changes as that predicted in Fig. 5A (dash  
375 line with triangle). To examine this possibility, we performed single-molecule tracking of  
376 FtsI again using a faster frame rate (20 Hz) in order to capture freely diffusing molecules.

377 The mean-square-displacement (MSD) analysis showed that the apparent diffusion  
378 constant of FtsI in wildtype *E. coli* cells was  $\sim 0.024 \mu\text{m}^2/\text{s}$  (Fig. 5D), well within the  
379 predicted range in Fig. 5A and similar to the measured diffusion constant of PBP1b<sup>18</sup>.  
380 In contrast, the TPase PBP2B diffused  $\sim 10$ -fold slower in *B. subtilis* ( $\sim 0.003 \mu\text{m}^2/\text{s}$ )  
381 than that in *E. coli*<sup>17,18</sup>, likely due to more viscous septal environment in *B. subtilis* than  
382 that in *E. coli*. The slow diffusion of PBP2B leads to the highly sensitive curve of the  
383 fraction of time of PBP2B spent in end-tracking on FtsZ's treadmilling speed as shown  
384 in Fig. 5A (continuous line with circle). As FtsZ's treadmilling speed increases, there will  
385 be reduced levels of end-tracking PBP2B molecules, leading to increased levels of  
386 available PBP2B molecules for active sPG synthesis, and hence faster septal cell wall  
387 constriction.

388

## 389 Discussion

390

391 We note that other mechanisms (but not necessarily exclusive from the Brownian  
392 Ratchet model) could also be at play. For instance, detailed molecular interactions  
393 among the septal ring complexes might be regulated distinctly to fulfil the different  
394 functional requirements in different systems. After all, the sPG synthesis in *B. subtilis*  
395 needs to produce a cell wall of  $\sim 10$  times thicker than *E. coli* ( $\sim 50 \text{ nm}$  vs.  $\sim 5 \text{ nm}$ )<sup>36,37</sup>.  
396 This may relate to the fact that the septal ring components are typically several-fold  
397 more abundant in *B. subtilis* than those in *E. coli*<sup>12</sup>. Nevertheless, our results in *E. coli*  
398 points to a mechanistic possibility that the same Brownian-ratchet machinery may be at  
399 work in *B. subtilis* but operate in a different regime of the parameter space. This

400 possibility precipitates further questions: What are the differences in sPG synthesis and  
401 cell division between *E. coli* and *B. subtilis*? How does the coupling between sPG  
402 synthesis complexes and FtsZ treadmilling adapt to the different systems? There could  
403 be many possible evolutionary routes revolving around these issues. For instance, a  
404 thicker cell wall and/or a more crowded periplasm – perhaps due to the presence of  
405 more abundant PG synthesizing-proteins – may slow down FtsI diffusion. A slower FtsI  
406 diffusion will in turn reduce the percentage of end-tracking FtsI which are inactive in  
407 sPG synthesis (Fig. 5A). Reciprocally, there will be more fraction of FtsI molecules  
408 active in PG-synthesis, meeting the requirement for producing a thicker cell wall. From  
409 evolutionary standpoint, is a thicker cell wall the cause or the result of a slower FtsI  
410 diffusion? Is it an emergent phenomenon of sPG synthesis being proportional to FtsZ  
411 treadmilling speed in *B. subtilis*? After all, FtsZ not only localizes the sPG-synthesizing  
412 enzymes to the septum but could also regulate the available level of enzymes for sPG  
413 synthesis by controlling the FtsZ treadmilling speed (Figs. 5A-C). This way, the  
414 chemical energy of FtsZ GTPase hydrolysis is harnessed “purposely” for bacterial cell  
415 division.

416

417 We further note that in addition to *E. coli* and *B. subtilis*, other bacteria seem to adopt  
418 more diverse strategies of exploiting FtsZ treadmilling in sPG synthase activity and cell  
419 division. For instance, in *S. aureus*, it was observed that septum constriction was  
420 dependent on FtsZ's treadmilling initially but becomes independent at a later stage<sup>38</sup>. In  
421 *S. pneumoniae*, the directional movement of the synthase complex was found to be  
422 completely independent of FtsZ's treadmilling<sup>15</sup>. It will be in our future work to

423 interrogate whether and how the Brownian-ratchet mechanism plays out under these  
424 different contexts. In a broader scope, given the lack of linear stepper motors in  
425 prokaryotic world, Brownian-ratcheting appears to be an ancient mechanism for directed  
426 cargo transportation in bacteria – another salient example is ParA-mediated DNA  
427 partitioning<sup>39-41</sup>. Interestingly, a similar Brownian-ratchet mechanism also underlies  
428 directional movements of mitotic chromosomes by end-tracking spindle microtubule in  
429 eukaryotes<sup>42</sup>. Can we distill unified fundamental principle(s) by which evolution shapes  
430 the same Brownian-ratchet mechanism to meet distinct needs under different contexts?  
431 We will relegate these exciting quests in our near-future study.

## 432 **Acknowledgements**

433

434 The authors would like to thank members in the Xiao and S. Holden labs for helpful  
435 discussions and technical assistance, Dr. G. Hauk for sharing plasmids and the  
436 CRISPR-Cas9/ $\lambda$ -red recombineering cloning method, R. McQuillen for help cloning  
437 pRM027, Dr. E. Goley for help with growth curve measurements, and Dr. L. Lavis for  
438 sharing JF646. This work was supported in part by NIH GM007445 (to J.W.M.), NIH  
439 R01 GM086447 (to J.X.), GM125656 (subcontract to J. X.), NSF EAGER Award MCB-  
440 1019000 (to J.X.), a Hamilton Smith Innovative Research Award (to J.X.), Johns  
441 Hopkins University Startup fund (to J.L.) and Catalyst Awards (to J.L.).

442

## 443 **Author Contributions**

444

445 J.W.M., X.Y and Z.L performed experiments. J.L. carried out theoretical modeling. All  
446 authors contributed to concept development, data analysis, and manuscript writing.

447

## 448 **Competing interests**

449

450 The authors declare no competing interests.

451

452

453

454

## 455 Reference

- 456 1 Egan, A. J. F. & Vollmer, W. The physiology of bacterial cell division. *Annals of*  
457 *the New York Academy of Sciences* **1277**, 8-28, doi:10.1111/j.1749-  
458 6632.2012.06818.x (2013).
- 459 2 de Pedro, M. A. & Cava, F. Structural constraints and dynamics of bacterial cell  
460 wall architecture. *Frontiers in Microbiology* **6**, doi:10.3389/fmicb.2015.00449  
461 (2015).
- 462 3 Typas, A., Banzhaf, M., Gross, C. A. & Vollmer, W. From the regulation of  
463 peptidoglycan synthesis to bacterial growth and morphology. *Nature Reviews*  
464 *Microbiology* **10**, 123, doi:10.1038/nrmicro2677 (2011).
- 465 4 Schmidt, L. S., Botta, G. & Park, J. T. Effects of furazlocillin, a beta-lactam  
466 antibiotic which binds selectively to penicillin-binding protein 3, on *Escherichia*  
467 *coli* mutants deficient in other penicillin-binding proteins. *Journal of Bacteriology*  
468 **145**, 632-637 (1981).
- 469 5 de Boer, P., Crossley, R. & Rothfield, L. The essential bacterial cell-division  
470 protein FtsZ is a GTPase. *Nature* **359**, 254-256, doi:10.1038/359254a0 (1992).
- 471 6 RayChaudhuri, D. & Park, J. T. *Escherichia coli* cell-division gene *ftsZ* encodes a  
472 novel GTP-binding protein. *Nature* **359**, 251-254, doi:10.1038/359251a0 (1992).
- 473 7 Löwe, J. & Amos, L. A. Crystal structure of the bacterial cell-division protein FtsZ.  
474 *Nature* **391**, 203-206, doi:10.1038/34472 (1998).
- 475 8 Bi, E. & Lutkenhaus, J. FtsZ ring structure associated with division in *Escherichia*  
476 *coli*. *Nature* **354**, 161-164, doi:10.1038/354161a0 (1991).
- 477 9 Hale, C. A. & de Boer, P. A. J. Direct Binding of FtsZ to ZipA, an Essential  
478 Component of the Septal Ring Structure That Mediates Cell Division in *E. coli*.  
479 *Cell* **88**, 175-185, doi:[https://doi.org/10.1016/S0092-8674\(00\)81838-3](https://doi.org/10.1016/S0092-8674(00)81838-3) (1997).
- 480 10 Pichoff, S. & Lutkenhaus, J. Unique and overlapping roles for ZipA and FtsA in  
481 septal ring assembly in *Escherichia coli*. *The EMBO Journal* **21**, 685-693,  
482 doi:10.1093/emboj/21.4.685 (2002).
- 483 11 Haeusser, D. P. & Margolin, W. Splitsville: structural and functional insights into  
484 the dynamic bacterial Z ring. *Nature Reviews Microbiology* **14**, 305,  
485 doi:10.1038/nrmicro.2016.26 (2016).
- 486 12 Bisson-Filho, A. W. *et al.* Treadmilling by FtsZ filaments drives peptidoglycan  
487 synthesis and bacterial cell division. *Science* **355**, 739-743,  
488 doi:10.1126/science.aak9973 (2017).
- 489 13 Yang, X. *et al.* GTPase activity-coupled treadmilling of the bacterial tubulin FtsZ  
490 organizes septal cell wall synthesis. *Science* **355**, 744-747,  
491 doi:10.1126/science.aak9995 (2017).
- 492 14 Yang, X. *et al.* FtsW exhibits distinct processive movements driven by either  
493 septal cell wall synthesis or FtsZ treadmilling in *E. coli*. *bioRxiv*, 850073,  
494 doi:10.1101/850073 (2019).
- 495 15 Perez, A. J. *et al.* Movement dynamics of divisome proteins and PBP2x:FtsW in  
496 cells of *Streptococcus pneumoniae*. *Proceedings of the National Academy of*  
497 *Sciences* **116**, 3211-3220, doi:10.1073/pnas.1816018116 (2019).

- 498 16 Monteiro, J. M. *et al.* Peptidoglycan synthesis drives an FtsZ-treadmilling-  
499 independent step of cytokinesis. *Nature* **554**, 528-532, doi:10.1038/nature25506  
500 (2018).
- 501 17 Cho, H. *et al.* Bacterial cell wall biogenesis is mediated by SEDS and PBP  
502 polymerase families functioning semi-autonomously. *Nature Microbiology* **1**,  
503 16172 (2016).
- 504 18 Lee, T. K., Meng, K., Shi, H. & Huang, K. C. Single-molecule imaging reveals  
505 modulation of cell wall synthesis dynamics in live bacterial cells. *Nature*  
506 *Communications* **7**, 13170 (2016).
- 507 19 Loose, M. & Mitchison, T. J. The bacterial cell division proteins FtsA and FtsZ  
508 self-organize into dynamic cytoskeletal patterns. *Nature Cell Biology* **16**, 38,  
509 doi:10.1038/ncb2885 (2013).
- 510 20 Ramirez-Diaz, D. A. *et al.* Treadmilling analysis reveals new insights into  
511 dynamic FtsZ ring architecture. *PLOS Biology* **16**, e2004845,  
512 doi:10.1371/journal.pbio.2004845 (2018).
- 513 21 Du, S. & Lutkenhaus, J. Assembly and activation of the Escherichia coli divisome.  
514 *Molecular Microbiology* **105**, 177-187, doi:10.1111/mmi.13696 (2017).
- 515 22 Li, Z., Trimble, M. J., Brun, Y. V. & Jensen, G. J. The structure of FtsZ filaments  
516 in vivo suggests a force - generating role in cell division. *The EMBO Journal* **26**,  
517 4694-4708, doi:10.1038/sj.emboj.7601895 (2007).
- 518 23 Löwe, J. & Amos, L. A. Tubulin - like protofilaments in Ca<sup>2+</sup> - induced FtsZ  
519 sheets. *The EMBO Journal* **18**, 2364-2371, doi:10.1093/emboj/18.9.2364 (1999).
- 520 24 Erickson, H. P., Taylor, D. W., Taylor, K. A. & Bramhill, D. Bacterial cell division  
521 protein FtsZ assembles into protofilament sheets and minirings, structural  
522 homologs of tubulin polymers. *Proceedings of the National Academy of Sciences*  
523 **93**, 519-523, doi:10.1073/pnas.93.1.519 (1996).
- 524 25 Oliva, M. A., Cordell, S. C. & Löwe, J. Structural insights into FtsZ protofilament  
525 formation. *Nature Structural & Molecular Biology* **11**, 1243-1250,  
526 doi:10.1038/nsmb855 (2004).
- 527 26 Baranova, N. *et al.* FtsZ assembles the bacterial cell division machinery by a  
528 diffusion-and-capture mechanism. *bioRxiv*, 485656, doi:10.1101/485656 (2018).
- 529 27 Zou, Y., Li, Y. & Dillon, J.-A. R. The distinctive cell division interactome of  
530 *Neisseria gonorrhoeae*. *BMC Microbiology* **17**, 232, doi:10.1186/s12866-017-  
531 1140-1 (2017).
- 532 28 Gerding, M. A. *et al.* Self-Enhanced Accumulation of FtsN at Division Sites and  
533 Roles for Other Proteins with a SPOR Domain (DamX, DedD, and RlpA) in  
534 *Escherichia coli* Cell Constriction. *Journal of Bacteriology* **191**, 7383-7401,  
535 doi:10.1128/jb.00811-09 (2009).
- 536 29 Glas, M. *et al.* The Soluble Periplasmic Domains of *Escherichia coli* Cell Division  
537 Proteins FtsQ/FtsB/FtsL Form a Trimeric Complex with Submicromolar Affinity.  
538 *Journal of Biological Chemistry* **290**, 21498-21509, doi:10.1074/jbc.M115.654756  
539 (2015).
- 540 30 Müller, P. *et al.* The Essential Cell Division Protein FtsN Interacts with the Murein  
541 (Peptidoglycan) Synthase PBP1B in *Escherichia coli*. *Journal of Biological*  
542 *Chemistry* **282**, 36394-36402, doi:10.1074/jbc.M706390200 (2007).

- 543 31 Grimm, J. B. *et al.* A general method to improve fluorophores for live-cell and  
544 single-molecule microscopy. *Nature Methods* **12**, 244-250,  
545 doi:10.1038/nmeth.3256 (2015).
- 546 32 Los, G. V. *et al.* HaloTag: A Novel Protein Labeling Technology for Cell Imaging  
547 and Protein Analysis. *ACS Chemical Biology* **3**, 373-382, doi:10.1021/cb800025k  
548 (2008).
- 549 33 Söderström, B., Chan, H., Shilling, P. J., Skoglund, U. & Daley, D. O. Spatial  
550 separation of FtsZ and FtsN during cell division. *Molecular Microbiology* **107**,  
551 387-401, doi:10.1111/mmi.13888 (2018).
- 552 34 Söderström, B., Badrutdinov, A., Chan, H. & Skoglund, U. Cell shape-  
553 independent FtsZ dynamics in synthetically remodeled bacterial cells. *Nature*  
554 *Communications* **9**, 4323, doi:10.1038/s41467-018-06887-7 (2018).
- 555 35 Buss, J. *et al.* A Multi-layered Protein Network Stabilizes the Escherichia coli  
556 FtsZ-ring and Modulates Constriction Dynamics. *PLOS Genetics* **11**, e1005128,  
557 doi:10.1371/journal.pgen.1005128 (2015).
- 558 36 Labischinski, H., Goodell, E. W., Goodell, A. & Hochberg, M. L. Direct proof of a  
559 "more-than-single-layered" peptidoglycan architecture of Escherichia coli W7: a  
560 neutron small-angle scattering study. *Journal of Bacteriology* **173**, 751-756,  
561 doi:10.1128/jb.173.2.751-756.1991 (1991).
- 562 37 Hayhurst, E. J., Kailas, L., Hobbs, J. K. & Foster, S. J. Cell wall peptidoglycan  
563 architecture in Bacillus subtilis. *Proceedings of the National Academy of*  
564 *Sciences* **105**, 14603-14608, doi:10.1073/pnas.0804138105 (2008).
- 565 38 Monteiro, J. M. *et al.* Peptidoglycan synthesis drives an FtsZ-treadmilling-  
566 independent step of cytokinesis. *Nature* **554**, 528, doi:10.1038/nature25506  
567 (2018).
- 568 39 Hu, L., Vecchiarelli, A. G., Mizuuchi, K., Neuman, K. C. & Liu, J. Directed and  
569 persistent movement arises from mechanochemistry of the ParA/ParB system.  
570 *Proceedings of the National Academy of Sciences* **112**, E7055-E7064,  
571 doi:10.1073/pnas.1505147112 (2015).
- 572 40 Hu, L., Vecchiarelli, A. G., Mizuuchi, K., Neuman, K. C. & Liu, J. Brownian  
573 Ratchet Mechanism for Faithful Segregation of Low-Copy-Number Plasmids.  
574 *Biophysical Journal* **112**, 1489-1502, doi:<https://doi.org/10.1016/j.bpj.2017.02.039>  
575 (2017).
- 576 41 Hu, L., Vecchiarelli, A. G., Mizuuchi, K., Neuman, K. C. & Liu, J. Brownian ratchet  
577 mechanisms of ParA-mediated partitioning. *Plasmid* **92**, 12-16,  
578 doi:<https://doi.org/10.1016/j.plasmid.2017.05.002> (2017).
- 579 42 Liu, J. & Onuchic, J. N. A driving and coupling "Pac-Man" mechanism for  
580 chromosome poleward translocation in anaphase A. *Proceedings of the National*  
581 *Academy of Sciences* **103**, 18432-18437, doi:10.1073/pnas.0608962103 (2006).
- 582

583



584 **Figure 1**

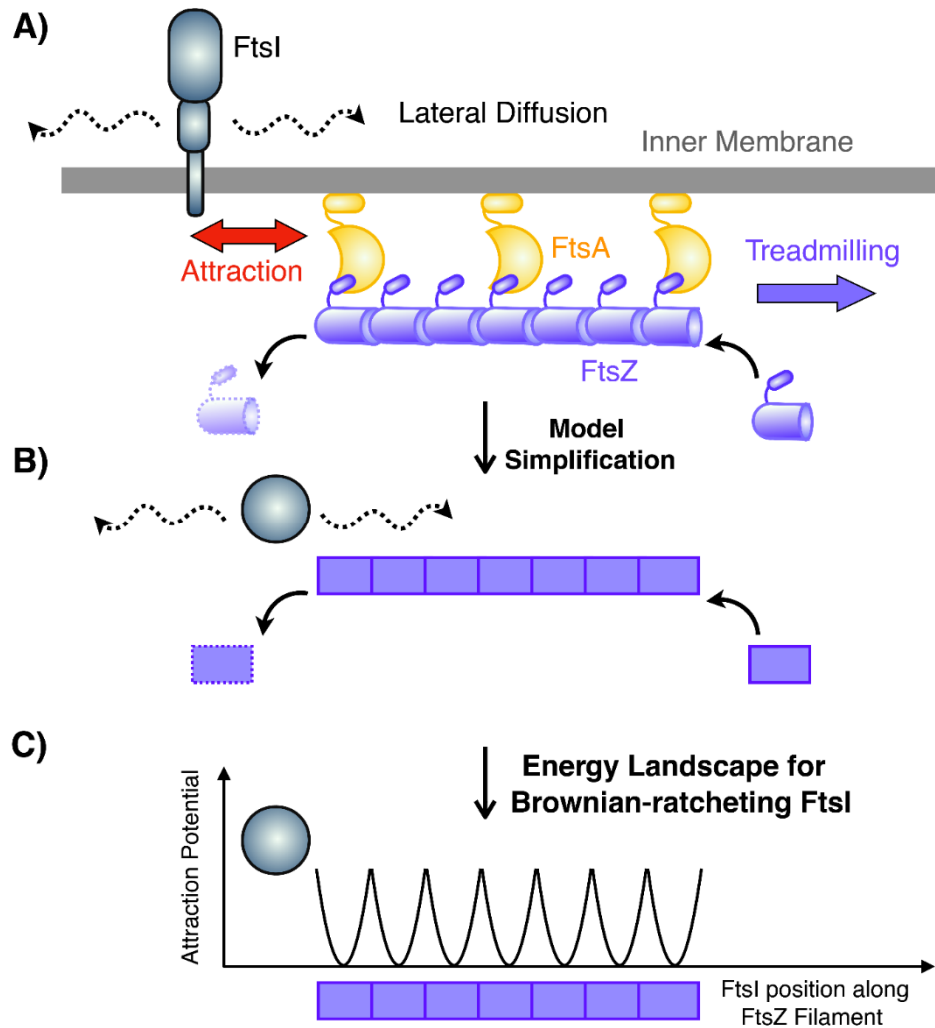

585

586 **Figure 1.** Model description. A) Schematic representation of sPG synthase complex's  
587 interaction with FtsZ treadmilling. B) Model simplification of FtsZ – FtsI interaction at the  
588 septum. The FtsZ filament (purple) undergoes treadmilling by dissociating FtsZ subunit  
589 from the left end and associating new ones from the right end. While the FtsI complex  
590 (grey) intrinsically diffuses around, it has binding affinity to FtsZ subunits. C) Schematics  
591 of FtsZ – FtsI binding potentials. Here, the binding potential is assumed to be harmonic  
592 and short-ranged (~ 5 nm), which is about the size of the individual FtsZ subunit.

593

594 **Figure 2**

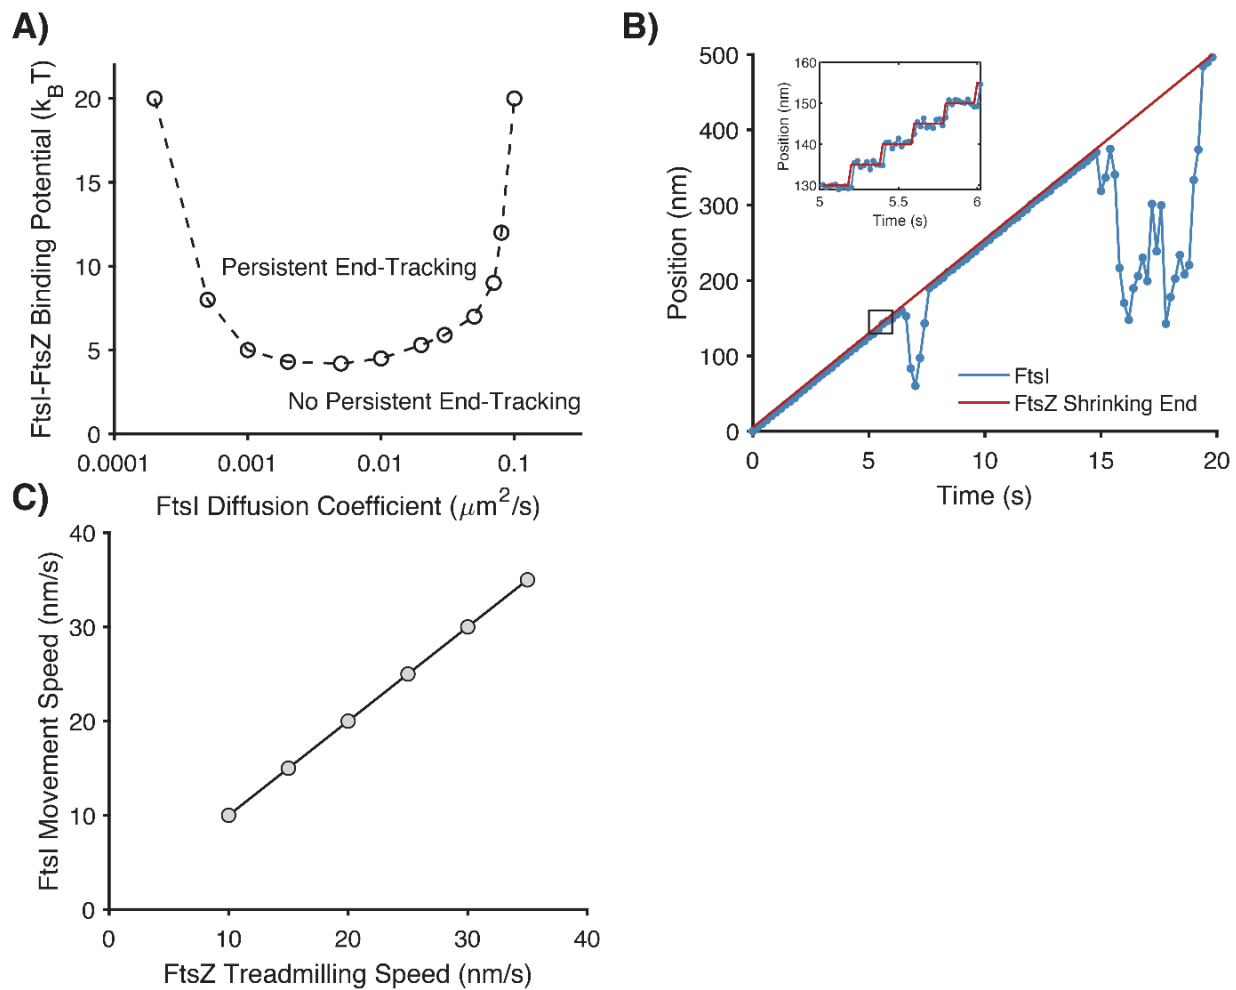

595  
 596 **Figure 2.** FtsZ treadmilling-mediated Brownian ratchet mechanism drives FtsI  
 597 directional movement. A) Calculated phase diagram – Dependence of FtsI motilities on  
 598 FtsI diffusion constant and FtsI-FtsZ binding potential. B) A representative simulated  
 599 trajectory of FtsI persistent end-tracking with FtsZ treadmilling. Here, the model is  
 600 simulated with following parameters: FtsZ treadmilling speed is 25 nm/sec, the FtsI  
 601 diffusion constant is  $0.01 \mu m^2/s$ , and the FtsZ–FtsI binding potential is  $10 k_B T$ . Inset: A  
 602 zoom-in view of the trajectory. Here, the simulation time step is  $10^{-5}$  s, the model results  
 603 are plotted every  $10^{-1}$  s, and those in the zoom-in inset are plotted every  $2 \times 10^{-2}$  s. C)  
 604 FtsI directional speed tightly couples with FtsZ treadmilling speed. The model calculated

605 the FtsI speed only from the part of its trajectory that the FtsI undergoes persistent end-  
606 tracking. Therefore, the FtsI speed varies very little as long as FtsZ treadmilling speed is  
607 fixed.  
608

609 **Figure 3**

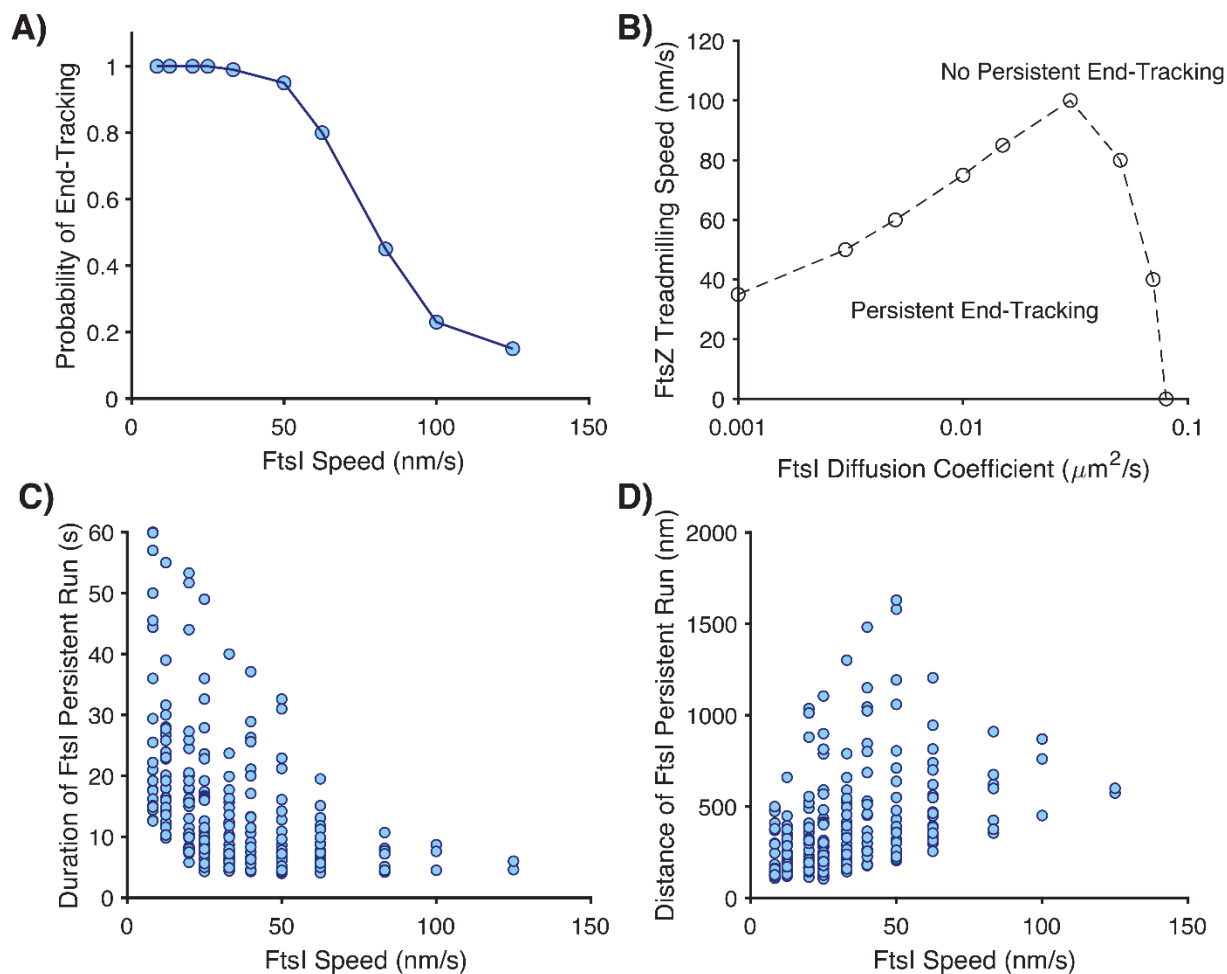

610

611 **Figure 3.** Model predictions on the processivity of FtsI directional movement modulated  
612 by FtsZ treadmilling speed. A) Predicted propensity of FtsI persistent end-tracking as a  
613 function of FtsZ treadmilling speed. B) Calculated phase diagram of FtsI persistent end-  
614 tracking characterized by FtsI diffusion constant and FtsZ treadmilling speed. C)  
615 Predicted FtsZ treadmilling speed-dependence of run distance of FtsI persistent end-  
616 tracking. D) Predicted FtsZ treadmilling speed-dependence of duration of FtsI/W  
617 persistent end-tracking. For the model calculations in (A-D), the FtsZ–FtsI binding  
618 potential is set to be  $10 k_B T$ .

619

620 **Figure 4**

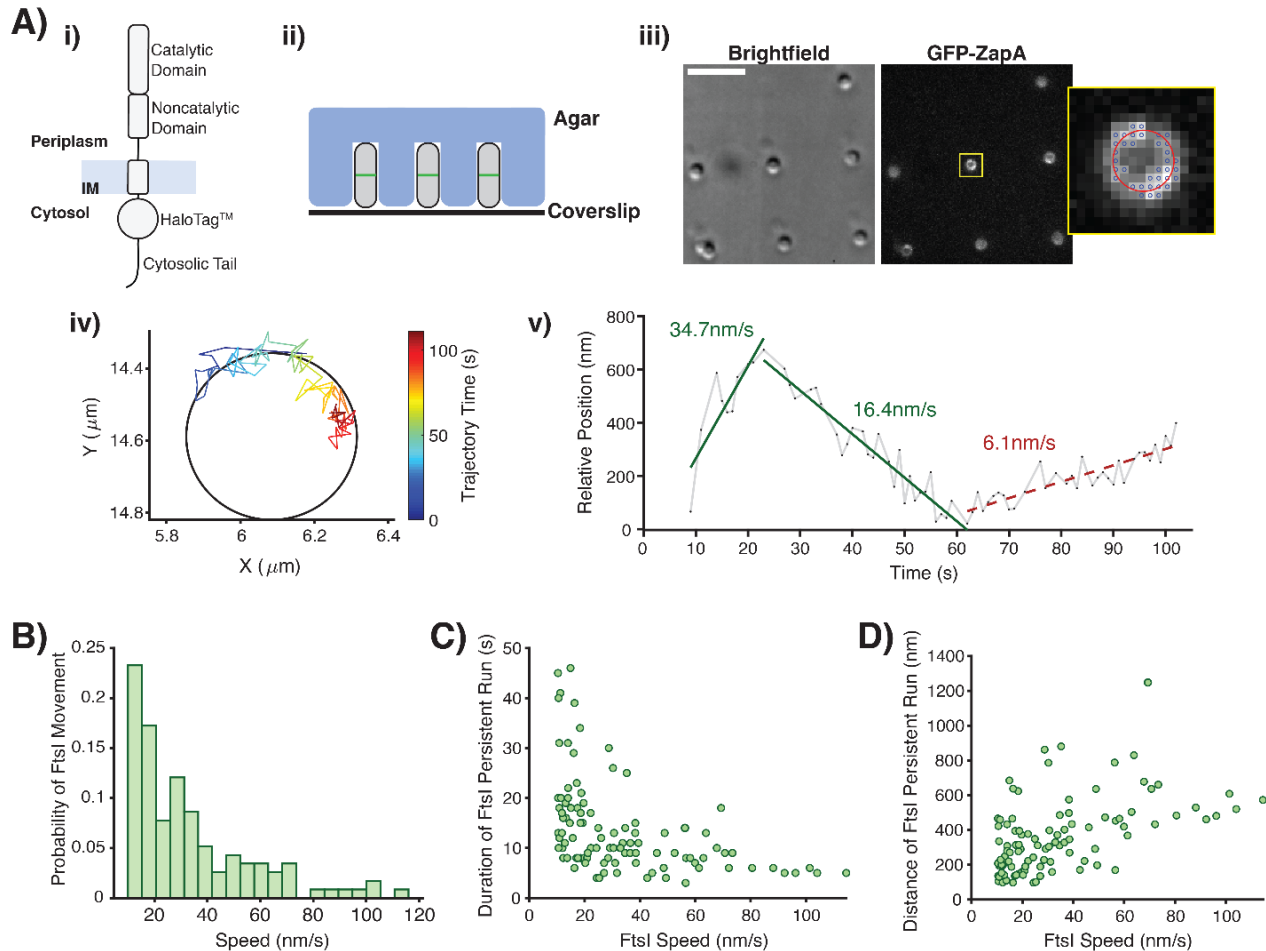

621

622 **Figure 4.** Experimental characterization of FtsI directional movements. A) Single

623 molecule tracking experimental setup. i, Schematics of the fully functional sandwich

624 fusion of FtsI. ii, schematics of individual *E. coli* cells loaded in microholes; iii, brightfield

625 and fluorescence images of microholes loaded with *E. coli* cells labeled with GFP-ZapA

626 and FtsI-Halo<sup>SW</sup> fusion proteins. Inset shows the zoomed image of one cell in the yellow

627 box with a circle fit to its intensity profile. iv, GFP-ZapA circle-fit super-imposed with the

628 trajectory of a single FtsI molecule; v the unwrapped trajectory from iv with fitted lines at

629 each segments to extract directional speeds Fitting the directional mobile events allow

630 us to identify movement states in our trajectories. Note that only movement events >10

631 nm/s were used for analysis in this work (fitted lines) because we recently showed that  
632 the slow-moving population (average speed  $\sim 8$  nm/s) is independent of FtsZ's  
633 treadmilling<sup>14</sup>. B) Histogram of FtsI directional movement speeds. C) Dependence of the  
634 duration of FtsI's persistent run on its speed. D) Dependence of the distance of FtsI's  
635 persistent run on its speed.  
636

637 **Figure 5**

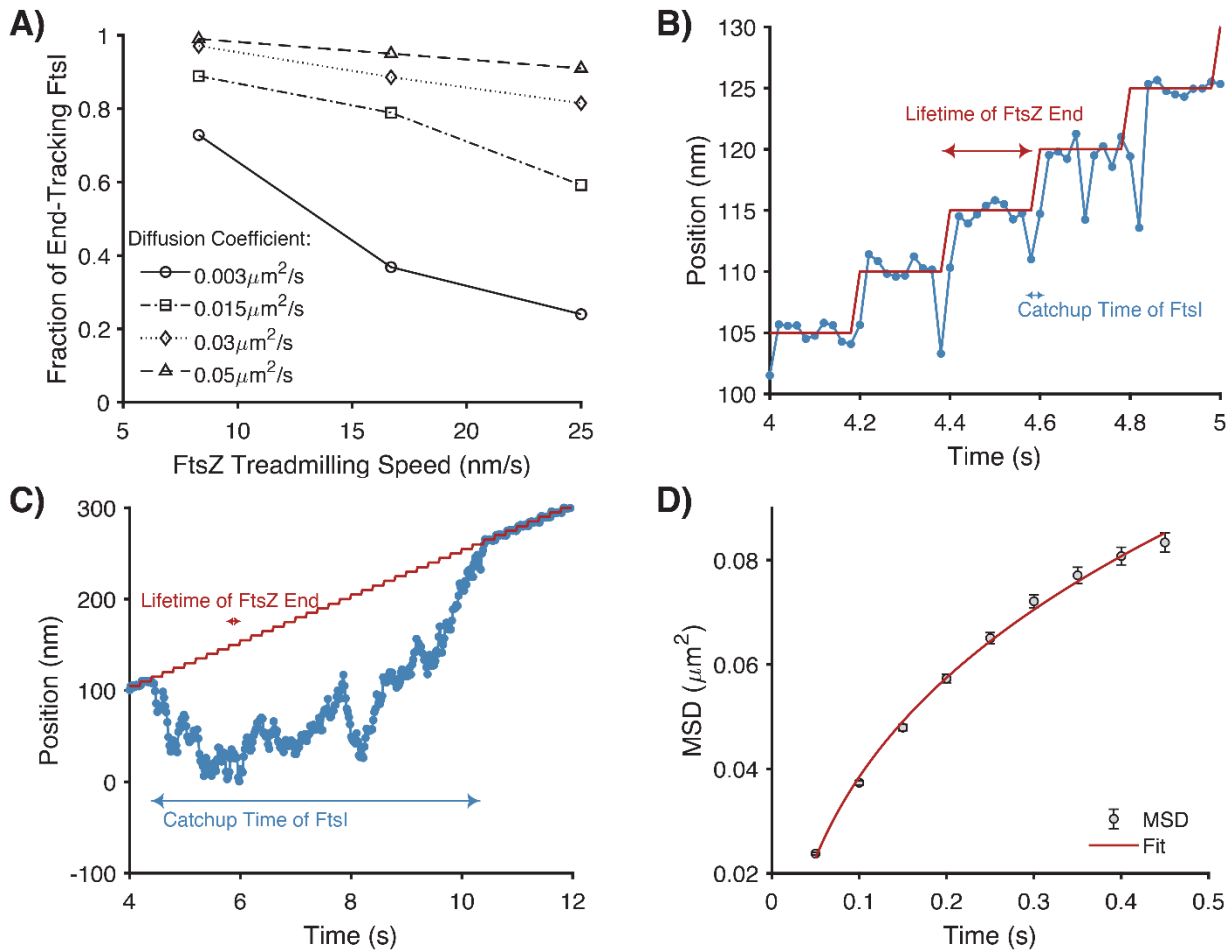

638

639 **Figure 5.** Dependence of FtsI's processivity on its diffusion. A) Predicted dependence  
640 of the fraction of end-tracking of FtsI on FtsZ treadmilling speed. The fraction of end-  
641 tracking is defined as the percentage of time that FtsI persistently end-tracks FtsZ  
642 treadmilling within 60 seconds. B) A representative trajectory of FtsI's persistent end-  
643 tracking when FtsI diffusion is fast. C) A representative trajectory of FtsI's persistent  
644 end-tracking when the FtsI diffusion is slow. For (B and C), a fast diffusion allows FtsI to  
645 catch up with the shrinking end of FtsZ almost immediately, whereas it takes a long time  
646 for FtsI to catch up (if it eventually catches up) when it diffuses slowly. Here, the  
647 simulation time step is  $10^{-5}$  s, the model results are plotted every  $2 \times 10^{-2}$  s. D)

648 Measured MSD of FtsI as a function of time in wildtype *E. coli* cells. From these data, A  
649 diffusion constant of FtsI at  $0.036 \pm 0.001 \mu\text{m}^2/\text{s}$  was determined by fitting the MSD  
650 curve with function  $\text{MSD} = 4Dt^\alpha$  with  $\alpha = 0.42 \pm 0.05$  (standard error from fitting).
